# Supplementary material
Source: Copernicus journal article supplement (doi:10.5194/essd-2026-114)
Supplement: Supplementary file [file essd-2026-114-AC1-supplement.pdf]

## **Answers to Referee #1: Sandip Dhomse**

**Citation:** <https://doi.org/10.5194/essd-2026-114-RC1>

**Antuña-Marrero et al., : "Extending the late 1963 to 1964 Mt Agung rescued searchlight aerosol profiles dataset at 32N, from early 1963 to 1976.**

### **Minor Comments:**

1. Title: Figure 3 and other tables clearly indicate that May 1975 is the end date, so the title should not state 1976.

**Corrected.**

2. Figure Quality: The quality of the figures should be improved for the final version of the manuscript.

**Corrected: The figures have been improved**

3. Altitude Range: There is a discrepancy in the defined altitude range for the sAOD calculation; for example, the abstract and section 2.2 mention the 12 to 25 km layer, but other places, such as table 3 and section 3.2, state it is 15 to 25 km.

**Corrected.** In Table 3 caption (on line 135) and in Section 3.2 (on line 178) the 15 km cited lower altitude for the sAOD calculation were both errors. The sAOD values on Table 3 the sAOD column "Elterman et al., 1973" were originally reported on Table 1 in Elterman et al., (1973). In the caption in that Figure 1 and also in the text of the article the lower altitude for calculating sAOD was reported as 12 km.

The cited errors on lines 135 and 178 have been corrected.

4. Citation Error: At line 153, the text states that ATP were reported both in Elterman et al. (1973) and Elterman et al. (1973), which is a redundant citation that should be corrected.

**Corrected.** The second reference was erroneously dated in 1973. It corresponds to the Elterman's article published in 1976
